# Supplementary material
Source: PubMed Central journal article supplement (PMC7047101)
Supplement: Supp_Fig2.pdf [file Supp_Fig2.pdf]

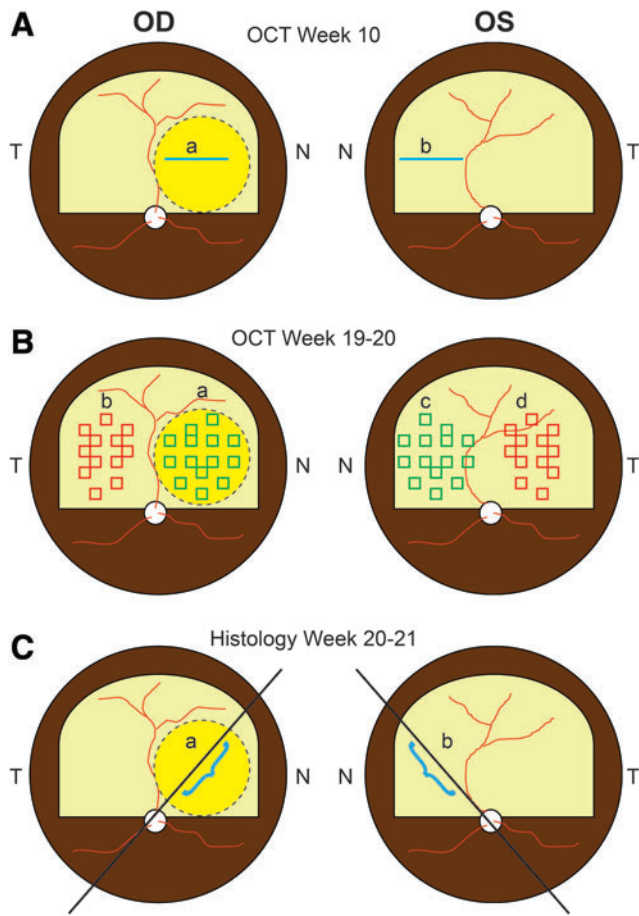

**Supplementary Figure S2.** Illustrations of the three different approaches used for ONL thickness analysis. **(A)** *In vivo* assessment at study week 10 was performed by manual segmentation of a single OCT B-scan (*blue line* in **a**) inside the treated area of the injected eye (OD), and the comparable area (*blue line* in **b**) in the uninjected eye (OS) was used for quantification. **(B)** At study week 19–20, loci selected inside (*green-a*) and outside (*red-b*) the outermost treatment boundary of the injected eye (OD) and their comparable areas in the uninjected contralateral eye (OS) were used for quantitative evaluation (**c, d**). **(C)** Quantification of ONL thickness by histology was performed on a single section (*black line*) that extended through the central region of the bleb/treated area and optic disk in the injected eye (OD) and a comparable area of the uninjected eye (OS). Selection of four locations within the bleb/treated area (**a**) and equivalent area (**b**) in OS are illustrated by the *blue bracket*. N, nasal retina; OD, right eye; OS, left eye; T, temporal.
