# Supplementary material
Source: PubMed Central journal article supplement (PMC7047101)
Supplement: Supp_Fig3.pdf [file Supp_Fig3.pdf]

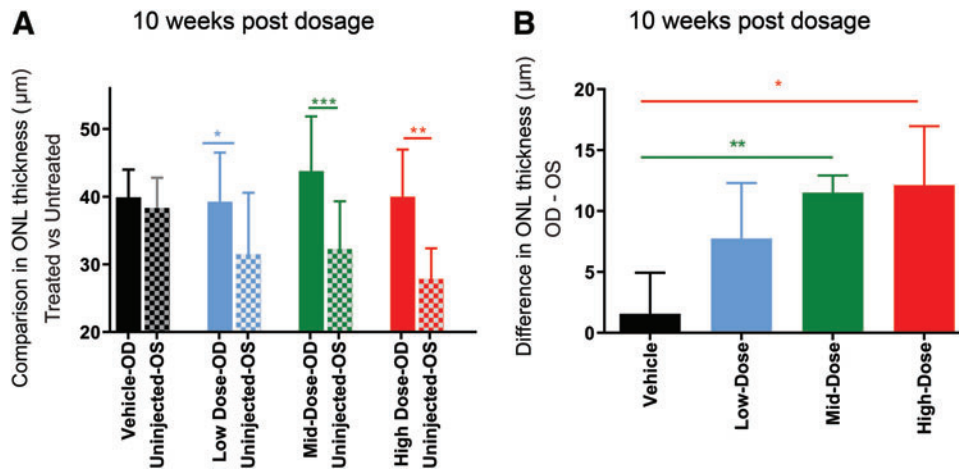

**Supplementary Figure S3.** Quantitative assessment of ONL thickness by *in vivo* OCT at study week 10. **(A)** Comparison of mean ( $\pm$ SD) ONL thickness in the bleb/treated area versus an area of comparable location (nasal quadrant) in OS (uninjected) within each treatment group. **(B)** Comparison between treatment groups of the difference (OD-OS) in ONL thickness between the bleb/treated area in injected right eyes (OD) and comparable area of contralateral uninjected left eyes (OS). Statistical analysis compared AGTC-501 treatment groups with vehicle-control group. \* $p \leq 0.05$ , \*\* $p \leq 0.01$ , \*\*\* $p \leq 0.001$ . SD, standard deviation.
