# Supplementary material
Source: PubMed Central journal article supplement (PMC7047101)
Supplement: Supp_Fig5.pdf [file Supp_Fig5.pdf]

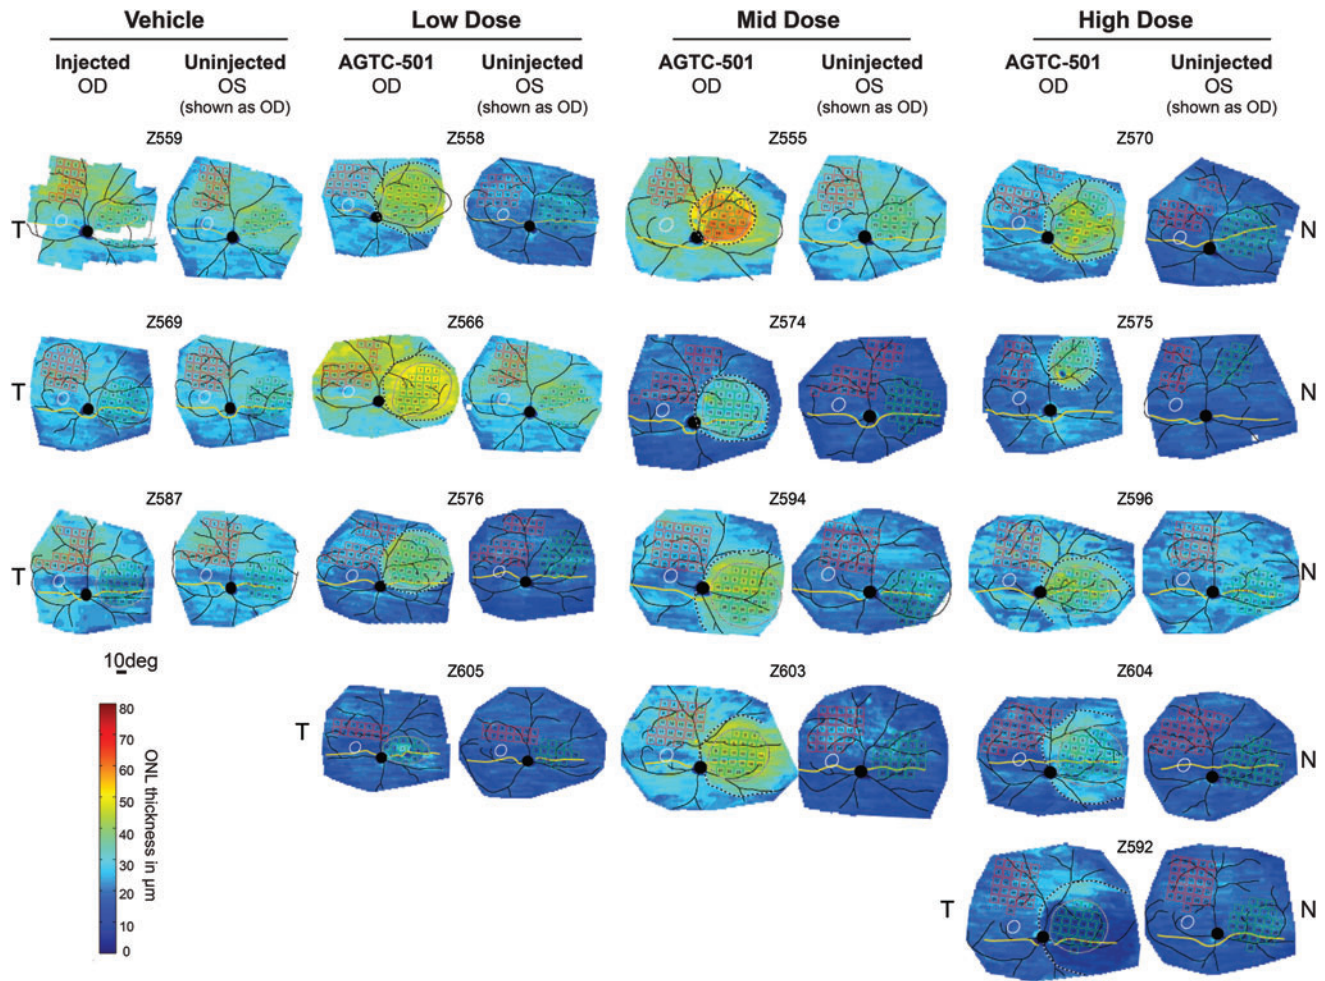

**Supplementary Figure S5.** Retinal loci selected for quantitative evaluation of ONL thickness rescue in all dogs per each group in both the injected right eye (OD) and the uninjected left eye (OS). Pseudocolor maps of treated eyes are duplicated from Supplementary Fig. S4. Treatment boundaries are based on fundus photographs of the bleb taken at the time of the injection (*dotted lines*), and, if visible, demarcations apparent on infrared imaging at the time of scanning (*dashed lines*). Schematics show loci selected inside (*green*) or outside (*red*) the outermost treatment boundary and their comparable area in the untreated contralateral eye (OS) for quantitative evaluation.
