# Supplementary material
Source: PubMed Central journal article supplement (PMC7047101)
Supplement: Supp_Fig6.pdf [file Supp_Fig6.pdf]

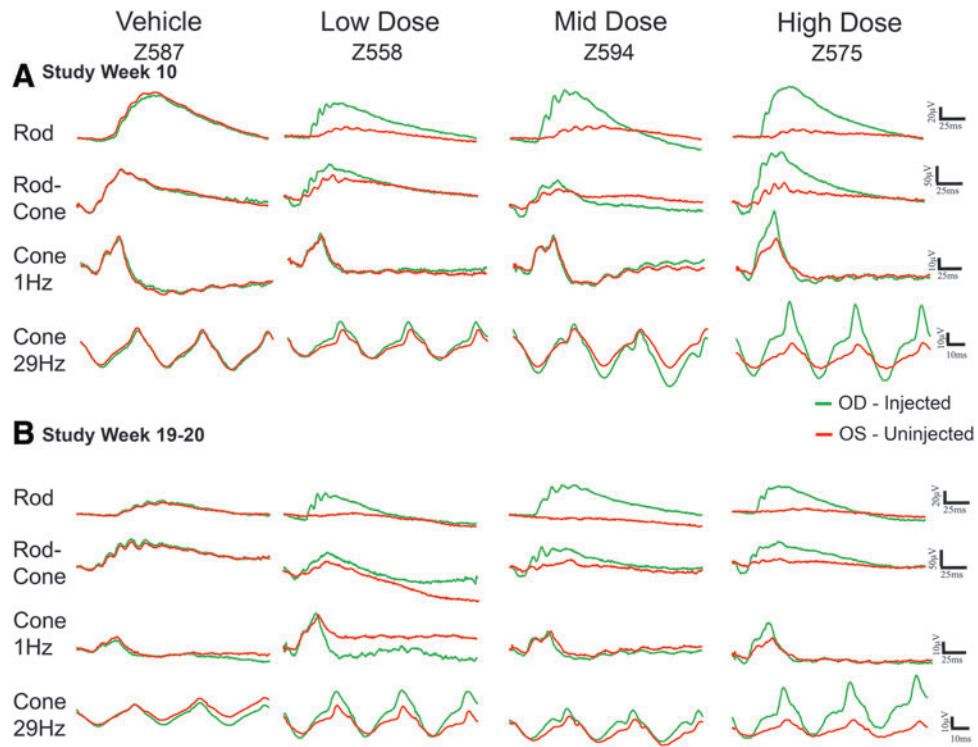

**Supplementary Figure S6.** Illustration of retinal function in one representative dog selected from each group. ERG traces of rod ( $-1.74 \log \text{cd.s.m}^{-2}$ ), mixed rod-cone ( $0.5 \log \text{cd.s.m}^{-2}$ ) recorded dark-adapted, and cone responses to 1Hz stimuli ( $0.5 \log \text{cd.s.m}^{-2}$ ) or 29Hz cone flicker ( $0.25 \log \text{cd.s.m}^{-2}$ ) recorded light adapted at (A) 10 and (B) 19–20 weeks postdosage for each treatment group. The *green trace* represents the injected eye (OD), and the *red trace* represents the uninjected eye (OS). ERG, electroretinography.
