# Supplementary material
Source: PubMed Central journal article supplement (PMC7047101)
Supplement: Supp_Fig7.pdf [file Supp_Fig7.pdf]

### High Dose - Optic nerve head infiltration

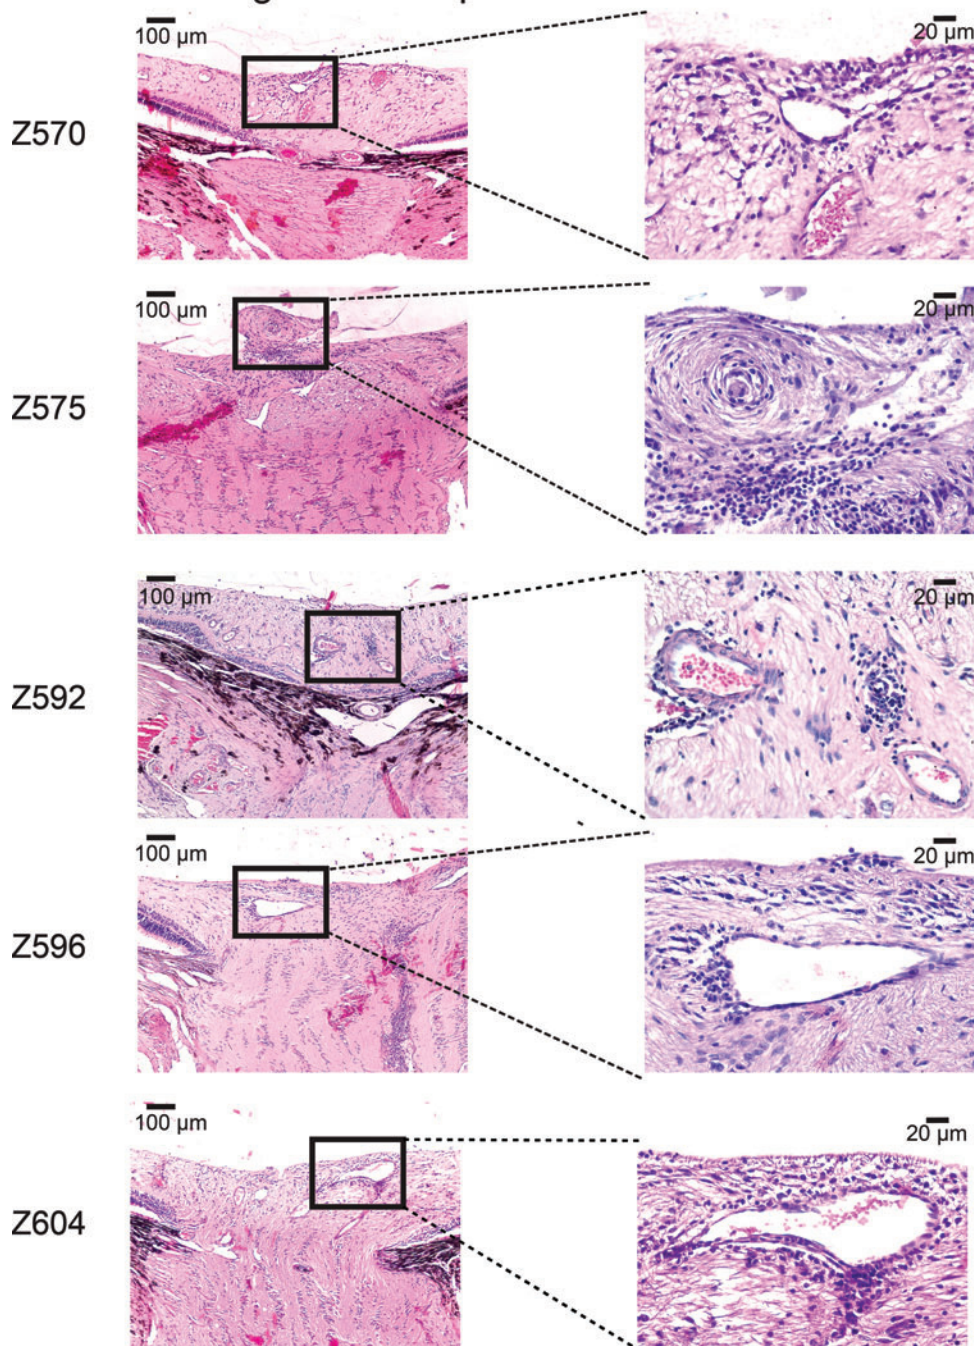

**Supplementary Figure S7.** Illustration of perivascular infiltration within the optic nerve head in the high-dose-treated group. Representative photomicrographs of hematoxylin and eosin-stained retinal sections showing lymphoplasmacytic infiltration around blood vessels within the optic nerve head of all five eyes treated in the high-dose group ( $3.0 \times 10^{12}$  vg/mL).
