# Supplementary material
Source: PubMed Central journal article supplement (PMC7047101)
Supplement: Supp_Fig8.pdf [file Supp_Fig8.pdf]

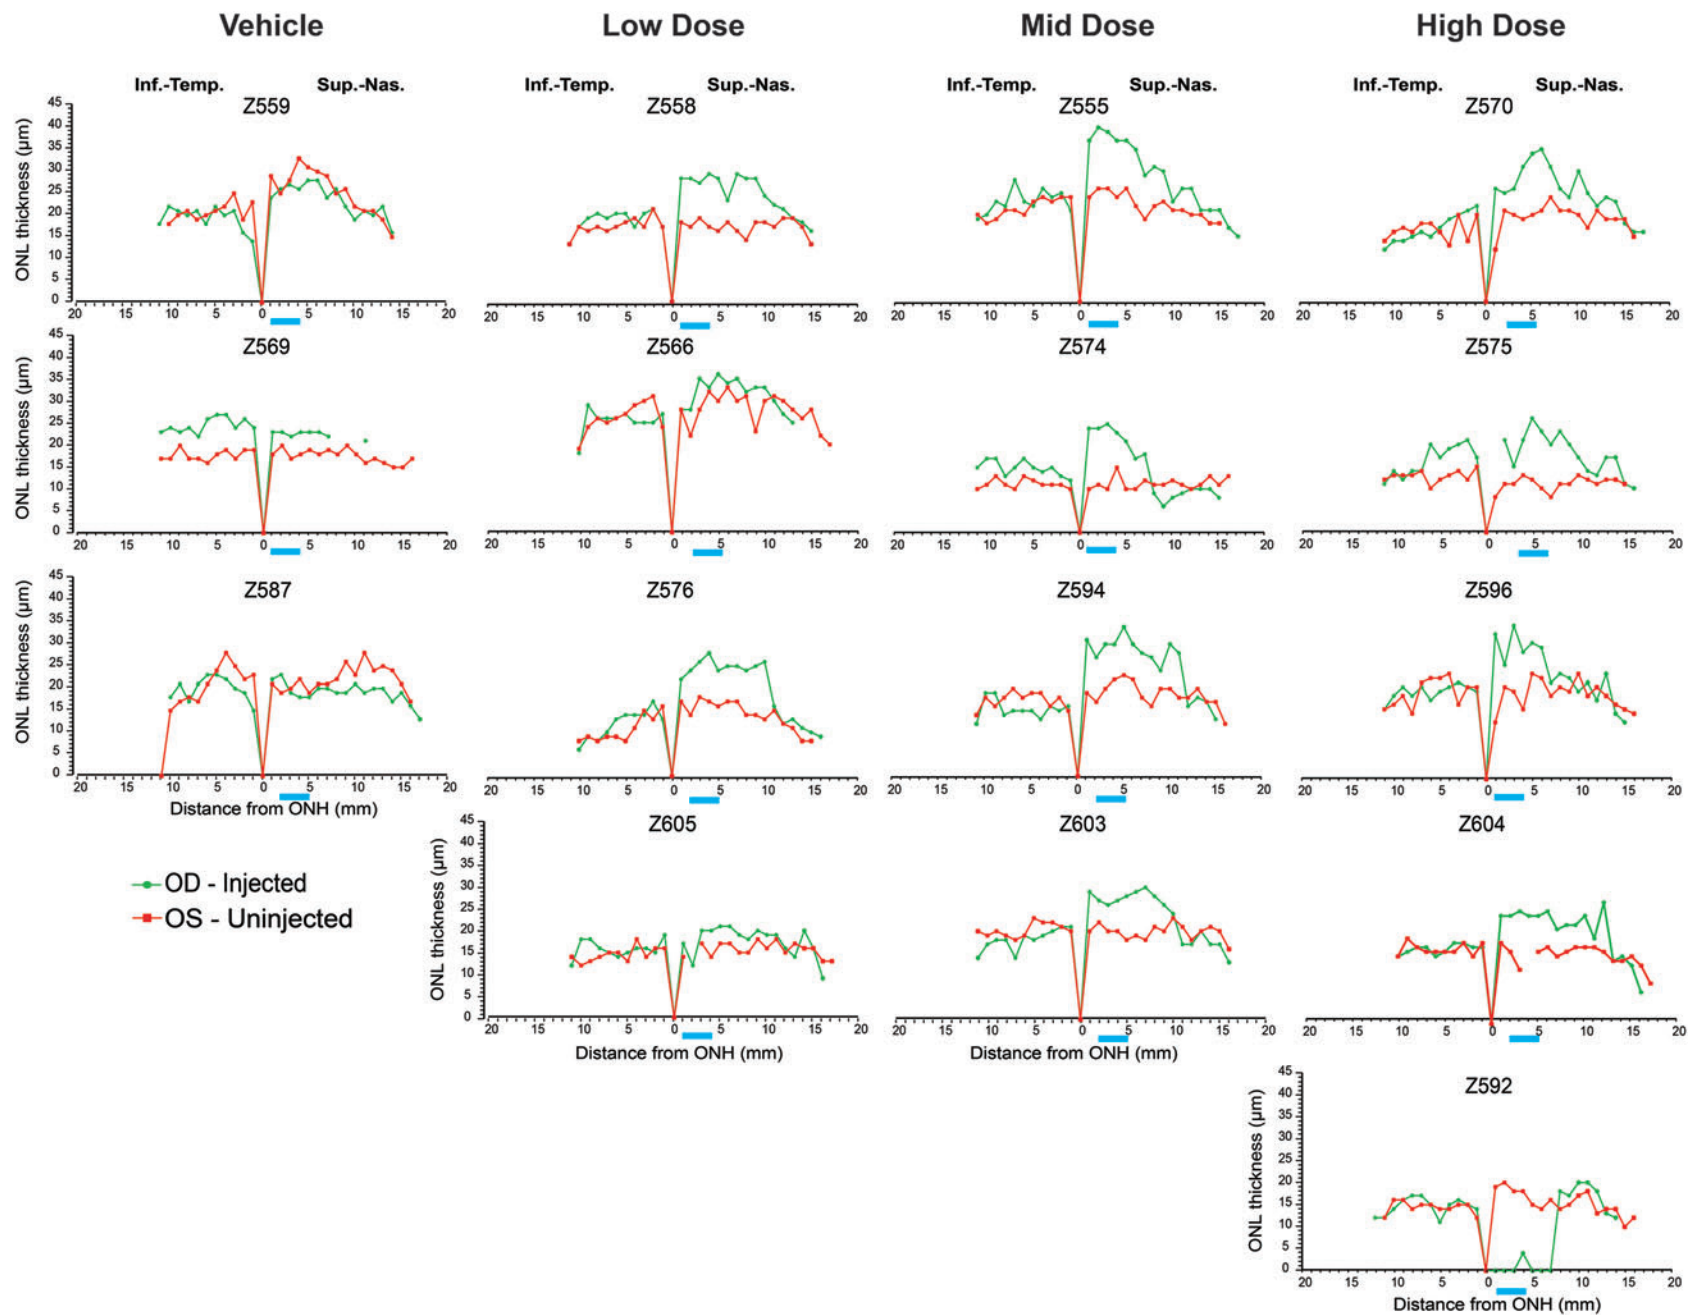

**Supplementary Figure S8.** ONL thickness determined by histology at study weeks 19–20. Spidergraphs of ONL thickness were measured in both eyes (*green trace*=OD/injected eye; *red trace*=OS/uninjected eye) extending from optic nerve head (ONH) to the peripheral ora serrata along both the Inf.–Temp. and Sup.–Nas. quadrants for all the dogs per treatment group. Supplementary Fig S2C illustrates the section orientation. *Blue bar* under x axis of spidergraphs corresponds to four locations within the bleb/treated area (and equivalent area in OS) used for calculation of the mean ONL thickness. Inf.–Temp., inferotemporal; Sup.–Nas., superonasal.
