# Supplementary material
Source: PubMed Central journal article supplement (PMC7047101)
Supplement: Supp_Tables1-3.pdf [file Supp_Tables1-3.pdf]

**Supplementary Table S1. Ophthalmic examination findings of vehicle-injected eyes**

| <i>Finding</i>                                 | <i>Predose</i> | <i>Study Day 0</i> | <i>Study Week 1</i> | <i>Study Week 2</i> | <i>Study Week 6</i> | <i>Study Week 10</i> | <i>Study Week 15</i> | <i>Study Week 20</i> |
|------------------------------------------------|----------------|--------------------|---------------------|---------------------|---------------------|----------------------|----------------------|----------------------|
| Conjunctival hyperemia                         |                |                    |                     |                     |                     |                      |                      |                      |
| Mild                                           | 0/3            | —                  | 3/3                 | 2/3                 | 0/3                 | 1/3                  | 0/3                  | 1/3                  |
| Moderate                                       | 0/3            | —                  | 0/3                 | 0/3                 | 2/3                 | 0/3                  | 0/3                  | 1/3                  |
| Conjunctival discharge                         |                |                    |                     |                     |                     |                      |                      |                      |
| Mild                                           | 0/3            | —                  | 0/3                 | 0/3                 | 0/3                 | 0/3                  | 0/3                  | 1/3                  |
| Preretinal (vitreal) hemorrhage                | 0/3            | 3/3                | 0/3                 | 0/3                 | 0/3                 | 0/3                  | 0/3                  | 0/3                  |
| Retinal fold                                   | 0/3            | —                  | 1/3                 | 1/3                 | 1/3                 | 0/3                  | 0/3                  | 0/3                  |
| Pigmentation at injection site                 | 0/3            | —                  | 2/3                 | 3/3                 | 3/3                 | 3/3                  | 3/3                  | 3/3                  |
| Tapetal alteration outside of the treated area | 0/3            | —                  | 1/3                 | 1/3                 | 1/3                 | 1/3                  | 1/3                  | 1/3                  |

—, not applicable.

**Supplementary Table S2. Ophthalmic examination findings of eyes injected with AGTC-501 at  $1.2 \times 10^{11}$  vg/mL (low dose)**

| <i>Finding</i>                                 | <i>Predose</i> | <i>Study Day 0</i> | <i>Study Week 1</i> | <i>Study Week 2</i> | <i>Study Week 6</i> | <i>Study Week 10</i> | <i>Study Week 15</i> | <i>Study Week 20</i> |
|------------------------------------------------|----------------|--------------------|---------------------|---------------------|---------------------|----------------------|----------------------|----------------------|
| Conjunctival hyperemia                         |                |                    |                     |                     |                     |                      |                      |                      |
| Mild                                           | 0/4            | —                  | 2/4                 | 1/4                 | 3/4                 | 2/4                  | 1/4                  | 2/4                  |
| Moderate                                       | 0/4            | —                  | 1/4                 | 1/4                 | 0/4                 | 1/4                  | 0/4                  | 0/4                  |
| Conjunctival chemosis                          |                |                    |                     |                     |                     |                      |                      |                      |
| Mild                                           | 0/4            | —                  | 0/4                 | 0/4                 | 0/4                 | 1/4                  | 0/4                  | 1/4                  |
| Pigmentation at injection site                 | 0/4            | —                  | 2/4                 | 3/4                 | 4/4                 | 4/4                  | 4/4                  | 3/4                  |
| Tapetal alteration outside of the treated area | 0/4            | —                  | 1/4                 | 1/4                 | 2/4                 | 2/4                  | 2/4                  | 2/4                  |
| Retinal atrophy                                | 0/4            | —                  | 0/4                 | 0/4                 | 0/4                 | 1/4 <sup>A</sup>     | 0/4                  | 1/4 <sup>a,b</sup>   |
| Bleb border visible                            | 0/4            | —                  | 0/4                 | 0/4                 | 0/4                 | 1/4                  | 2/4                  | 3/4                  |

<sup>A</sup>Detected by OCT.

<sup>b</sup>At week 19.

—, no observations noted; AGTC, Applied Genetic Technologies Corporation; OCT, optical coherence tomography; vg, vector genome.

**Supplementary Table S3. Ophthalmic examination findings of eyes injected with AGTC-501 at  $6.0 \times 10^{11}$  vg/mL (mid dose)**

| <i>Finding</i>                                 | <i>Predose</i> | <i>Study Day 0</i> | <i>Study Week 1</i> | <i>Study Week 2</i> | <i>Study Week 6</i> | <i>Study Week 10</i> | <i>Study Week 15</i> | <i>Study Week 20</i> |
|------------------------------------------------|----------------|--------------------|---------------------|---------------------|---------------------|----------------------|----------------------|----------------------|
| Conjunctival hyperemia                         |                |                    |                     |                     |                     |                      |                      |                      |
| Mild                                           | 0/4            | —                  | 1/4                 | 0/4                 | 2/4                 | 2/4                  | 1/4                  | 0/4                  |
| Moderate                                       | 0/4            | —                  | 0/4                 | 0/4                 | 0/4                 | 0/4                  | 0/4                  | 1/4                  |
| Conjunctival chemosis                          |                |                    |                     |                     |                     |                      |                      |                      |
| Mild                                           | 0/4            | —                  | 1/4                 | 1/4                 | 0/4                 | 1/4                  | 0/4                  | 0/4                  |
| Incipient posterior Y suture cataract          | 0/4            | —                  | 0/4                 | 0/4                 | 0/4                 | 1/4                  | 1/4                  | 1/4                  |
| Vitreal blood clot                             | 0/4            | —                  | 1/4                 | 0/4                 | 0/4                 | 0/4                  | 0/4                  | 0/4                  |
| Preretinal (vitreal) hemorrhage                | 0/4            | 1/4                | 0/4                 | 0/4                 | 0/4                 | 0/4                  | 0/4                  | 0/4                  |
| Pigmentation at injection site                 | 0/4            | —                  | 3/4                 | 3/4                 | 4/4                 | 4/4                  | 4/4                  | 4/4                  |
| Tapetal alteration outside of the treated area | 0/4            | —                  | 3/4                 | 3/4                 | 2/4                 | 2/4                  | 2/4                  | 2/4                  |
| Bleb border visible                            | 0/4            | —                  | 0/4                 | 0/4                 | 1/4                 | 2/4                  | 3/4                  | 3/4                  |
| Retinal detachment                             | 0/4            | —                  | 0/4                 | 0/4                 | 0/4                 | 0/4                  | 0/4                  | 1/4 <sup>a,b</sup>   |

<sup>A</sup>Detected by OCT.

<sup>b</sup>At week 19.

—, no observations noted.
