# Supplementary material
Source: PubMed Central journal article supplement (PMC7047101)
Supplement: Supp_Tables4-7.pdf [file Supp_Tables4-7.pdf]

**Supplementary Table S4. Ophthalmic examination findings of eyes injected with AGTC-501 at 3.0 × 10<sup>12</sup> vg/mL (high dose)**

| Finding                                        | Pre-dose | Study Day 0 | Study Week 1 | Study Week 2 | Study Week 6 | Study Week 10    | Study Week 15 | Study Week 20      |
|------------------------------------------------|----------|-------------|--------------|--------------|--------------|------------------|---------------|--------------------|
| Conjunctival hyperemia                         |          |             |              |              |              |                  |               |                    |
| Mild                                           | 0/5      | —           | 3/5          | 2/5          | 2/5          | 1/5              | 2/5           | 2/5                |
| Conjunctival chemosis                          |          |             |              |              |              |                  |               |                    |
| Mild                                           | 0/5      | —           | 0/5          | 0/5          | 0/5          | 1/5              | 0/5           | 0/5                |
| Corneal epithelial deposit                     | 0/5      | —           | 0/5          | 0/5          | 0/5          | 2/5              | 2/5           | 1/5                |
| Vitreous strand/fibrin                         | 0/5      | —           | 0/5          | 0/5          | 0/5          | 1/5              | 1/5           | 1/5                |
| Vitreous cells                                 | 0/5      | —           | 0/5          | 0/5          | 0/5          | 2/5              | 2/5           | 1/5                |
| Vitreous blood clot                            | 0/5      | —           | 1/5          | 1/5          | 1/5          | 1/5              | 0/5           | 0/5                |
| Retinal fold                                   | 0/5      | —           | 1/5          | 1/5          | 2/5          | 1/5              | 1/5           | 1/5                |
| Changes in transparency of the vitreous        | 0/5      | —           | 0/5          | 0/5          | 0/5          | 1/5              | 0/5           | 0/5                |
| Pigmentation at injection site                 | 0/5      | —           | 4/5          | 4/5          | 4/5          | 5/5              | 5/5           | 5/5                |
| Bleb border visible                            | 0/5      | —           | 0/5          | 0/5          | 1/5          | 4/5              | 4/5           | 4/5                |
| Retinal detachment                             | 0/5      | —           | 0/5          | 0/5          | 0/5          | 2/5 <sup>A</sup> | 0/5           | 1/5 <sup>a,b</sup> |
| Chorioretinitis                                | 0/5      | —           | 0/5          | 0/5          | 0/5          | 1/5              | 1/5           | 1/5                |
| Retinal atrophy                                | 0/5      | —           | 0/5          | 0/5          | 0/5          | 0/5              | 0/5           | 1/5                |
| Tapetal alteration outside of the treated area | 0/5      | —           | 3/5          | 3/5          | 3/5          | 3/5              | 3/5           | 3/5                |
| Dilated retinal vessels                        | 0/5      | —           | 0/5          | 0/5          | 0/5          | 2/5              | 1/5           | 1/5                |

<sup>A</sup>Detected by OCT.

<sup>b</sup>At week 19.

—, no observations noted.

**Supplementary Table S5. Gross pathology findings summary**

| Finding                               | Vehicle | Low Dose | Mid Dose | High Dose |
|---------------------------------------|---------|----------|----------|-----------|
| Skin alopecia                         | 1/3     | 1/4      | 1/4      | 0/5       |
| Umbilical hernia                      | 0/3     | 0/4      | 1/4      | 0/5       |
| Blepharitis                           | 0/3     | 0/4      | 1/4      | 0/5       |
| Submandibular lymph nodes enlargement | 0/3     | 0/4      | 1/4      | 0/5       |

**Supplementary Table S6. Histopathology findings summary**

| Finding                                                     | Vehicle | Low Dose | Mid Dose | High Dose |
|-------------------------------------------------------------|---------|----------|----------|-----------|
| Skin                                                        |         |          |          |           |
| Demodicosis                                                 | 1/3     | 1/4      | 1/4      | 0/5       |
| Juvenile sterile granulomatous dermatitis and lymphadenitis | 0/3     | 0/4      | 1/4      | 0/5       |
| Lungs                                                       |         |          |          |           |
| Multifocal mononuclear infiltrates (left and right)         | 1/3     | 0/4      | 1/4      | 0/5       |
| Minimal focal mononuclear infiltrate (right)                | 1/3     | 0/4      | 0/4      | 0/5       |
| Minimal mononuclear infiltrates (left and right)            | 0/3     | 0/4      | 1/4      | 2/5       |
| Moderate mononuclear infiltrates (left and right)           | 0/3     | 1/4      | 0/4      | 0/5       |
| Minimal multifocal mononuclear infiltrates (left and right) | 0/3     | 1/4      | 0/4      | 0/5       |
| Liver                                                       |         |          |          |           |
| Focal microabscess                                          | 1/3     | 0/4      | 0/4      | 0/5       |
| Focal microgranuloma                                        | 0/3     | 0/4      | 0/4      | 1/5       |
| Kidneys                                                     |         |          |          |           |
| Minimal focal mononuclear infiltrate (left)                 | 1/3     | 0/4      | 0/4      | 0/5       |
| Minimal mononuclear infiltrates (left and right)            | 0/3     | 1/4      | 0/4      | 0/5       |
| Optic tract                                                 |         |          |          |           |
| Focal mononuclear infiltrate                                | 0/3     | 0/4      | 0/4      | 1/5       |

**Supplementary Table S7. Ocular histopathology findings summary**

| Finding                                                                                                                        | Vehicle |      | Low Dose |      | Mid Dose |      | High Dose |      |
|--------------------------------------------------------------------------------------------------------------------------------|---------|------|----------|------|----------|------|-----------|------|
|                                                                                                                                | Tx      | UnTx | Tx       | UnTx | Tx       | UnTx | Tx        | UnTx |
| Few perivascular conjunctival and episcleral aggregates of lymphocytes and plasma cells                                        | 0/3     | 0/3  | 1/4      | 1/4  | 0/4      | 0/4  | 0/5       | 0/5  |
| Minimal perivascular lymphoplasmacytic infiltrates within the retinal ganglion cell layer.                                     | 0/3     | 0/3  | 0/4      | 0/4  | 0/4      | 0/4  | 0/5       | 1/5  |
| Perivascular infiltrate of small lymphocytes and plasma cells within the retinal ganglion cell layer and the optic nerve head. |         |      |          |      |          |      |           |      |
| Minimal focal                                                                                                                  | 0/3     | 0/3  | 0/4      | 0/4  | 0/4      | 0/4  | 1/5       | 0/5  |
| Mild                                                                                                                           | 0/3     | 0/3  | 0/4      | 0/4  | 0/4      | 0/4  | 1/5       | 0/5  |
| Multifocal moderate + milder similar infiltrate in the inner nuclear layer and choroid                                         | 0/3     | 0/3  | 0/4      | 0/4  | 0/4      | 0/4  | 1/5       | 0/5  |
| Moderate                                                                                                                       | 0/3     | 0/3  | 0/4      | 0/4  | 0/4      | 0/4  | 2/5       | 0/5  |
| Multifocal outer nuclear layer to complete retinal atrophy                                                                     | 0/3     | 0/3  | 0/4      | 0/4  | 0/4      | 0/4  | 1/5       | 0/5  |

Tx, treated; UnTx, untreated.
